# Supplementary material
Source: publisher figshare collection journal article supplement (https://frontiersin.figshare.com/ndownloader/files/18028478)
Supplement: Supplementary file 1 [file 18028478]

## Sheet: Data
Site	Region	N	Y	LogN	LogY	Centered LogN	Centered LogY
15	Upper Mantaro	10	125.66	2.30259	4.83358	-1.17641	-1.20961
17	Upper Mantaro	23	136.606	3.13549	4.9171	-0.343503	-1.12609
20	Upper Mantaro	5	29.697	1.60944	3.39105	-1.86956	-2.65215
131	Upper Mantaro	25	126.561	3.21888	4.84072	-0.260121	-1.20247
322	Upper Mantaro	80	832.842	4.38203	6.72484	0.903029	0.681652
302	Upper Mantaro	45	497.25	3.80666	6.20909	0.327665	0.165901
304	Upper Mantaro	2	7.95192	0.693147	2.07341	-2.78585	-3.96978
305	Upper Mantaro	30	477	3.4012	6.16752	-0.0777998	0.124324
307	Upper Mantaro	19	454.636	2.94444	6.1195	-0.534558	0.0763048
31	Upper Mantaro	58	1138.79	4.06044	7.03772	0.581446	0.994533
310	Upper Mantaro	3	21.2051	1.09861	3.05424	-2.38038	-2.98895
311	Upper Mantaro	40	1327.28	3.68888	7.19089	0.209882	1.1477
298	Upper Mantaro	125	2969.7	4.82831	7.99622	1.34932	1.95302
32	Upper Mantaro	16	153.934	2.77259	5.03652	-0.706408	-1.00667
28	Upper Mantaro	25	397.596	3.21888	5.98544	-0.260121	-0.0577557
325	Upper Mantaro	3	21.0088	1.09861	3.04494	-2.38038	-2.99825
101	Upper Mantaro	61	970.134	4.11087	6.87743	0.631877	0.834242
33	Upper Mantaro	48	1357.13	3.8712	7.21313	0.392204	1.16993
J-108	Upper Mantaro	200	4799.4	5.29832	8.47625	1.81932	2.43305
339	Upper Mantaro	5	48.1042	1.60944	3.87337	-1.86956	-2.16982
34	Upper Mantaro	48	662.364	3.8712	6.49581	0.392204	0.452622
318	Upper Mantaro	25	148.485	3.21888	5.00048	-0.260121	-1.04271
181	Upper Mantaro	100	1418.58	4.60517	7.25741	1.12617	1.21422
139	Upper Mantaro	45	738.253	3.80666	6.60429	0.327665	0.561094
14	Upper Mantaro	21	263.886	3.04452	5.57552	-0.434475	-0.467675
142	Upper Mantaro	1	4	0	1.38629	-3.479	-4.6569
162	Upper Mantaro	7	111.327	1.94591	4.71247	-1.53309	-1.33072
164	Upper Mantaro	50	1413.68	3.91202	7.25395	0.433026	1.21076
166	Upper Mantaro	35	247.393	3.55535	5.51098	0.0763509	-0.532214
296	Upper Mantaro	45	1069.09	3.80666	6.97456	0.327665	0.931372
177	Upper Mantaro	10	39.7596	2.30259	3.68285	-1.17641	-2.36034
341	Upper Mantaro	58	711.639	4.06044	6.56757	0.581446	0.524378
219	Upper Mantaro	11	175	2.3979	5.16479	-1.0811	-0.878406
22	Upper Mantaro	63	606.113	4.14313	6.40707	0.664138	0.363874
23	Upper Mantaro	62	1152.7	4.12713	7.04986	0.648137	1.00667
257	Upper Mantaro	75	1192.79	4.31749	7.08405	0.838491	1.04086
27	Upper Mantaro	28	461.015	3.3322	6.13343	-0.146793	0.0902385
337	Upper Mantaro	32	453.95	3.46574	6.11799	-0.0132613	0.0747947
291	Upper Mantaro	30	738.155	3.4012	6.60415	-0.0777998	0.560961
171	Upper Mantaro	9	63.6154	2.19722	4.15286	-1.28177	-1.89034
80	Upper Mantaro	15	180.293	2.70805	5.19458	-0.770947	-0.848608
73	Upper Mantaro	45	379.474	3.80666	5.93879	0.327665	-0.104406
476	Upper Mantaro	500	7923.05	6.21461	8.97753	2.73561	2.93434
81	Upper Mantaro	32	226.188	3.46574	5.42137	-0.0132613	-0.621826
48	Upper Mantaro	37	739.548	3.61092	6.60604	0.131921	0.562847
347	Upper Mantaro	60	1178.06	4.09434	7.07163	0.615347	1.02843
328	Upper Mantaro	6	117.806	1.79176	4.76904	-1.68724	-1.27415
468	Upper Mantaro	4280	60132.1	8.36171	11.0043	4.88271	4.96111
53	Upper Mantaro	15	165.665	2.70805	5.10997	-0.770947	-0.933224
462	Upper Mantaro	100	962.828	4.60517	6.86987	1.12617	0.826682
566	Upper Mantaro	100	1963.44	4.60517	7.58245	1.12617	1.53926
79	Upper Mantaro	10	96.2	2.30259	4.56643	-1.17641	-1.47676
75	Upper Mantaro	13	308.854	2.56495	5.73287	-0.914048	-0.310324
74	Upper Mantaro	25	397.596	3.21888	5.98544	-0.260121	-0.0577557
634	Upper Mantaro	200	1413.68	5.29832	7.25395	1.81932	1.21076
635	Upper Mantaro	200	1413.68	5.29832	7.25395	1.81932	1.21076
67	Upper Mantaro	10	82.9552	2.30259	4.4183	-1.17641	-1.62489
52	Upper Mantaro	24	381.692	3.17805	5.94461	-0.300943	-0.0985777
425	Upper Mantaro	12	71.2728	2.48491	4.26651	-0.994091	-1.77668
348	Upper Mantaro	35	687.203	3.55535	6.53263	0.0763509	0.489438
356	Upper Mantaro	8	88.3547	2.07944	4.48136	-1.39956	-1.56183
401	Upper Mantaro	30	331.33	3.4012	5.80312	-0.0777998	-0.240077
402	Upper Mantaro	25	397.596	3.21888	5.98544	-0.260121	-0.0577557
403	Upper Mantaro	90	993.99	4.49981	6.90173	1.02081	0.858535
472	Upper Mantaro	4750	117661	8.4659	11.6756	4.9869	5.63237
99	Upper Mantaro	9	31.2099	2.19722	3.44073	-1.28177	-2.60246
51	Upper Mantaro	26	326.716	3.2581	5.78909	-0.220901	-0.254101
427	Upper Mantaro	9	53.4546	2.19722	3.97883	-1.28177	-2.06436
89	Upper Mantaro	25	416.314	3.21888	6.03144	-0.260121	-0.0117535
82	Upper Mantaro	12	144	2.48491	4.96981	-0.994091	-1.07338
44	Upper Mantaro	33	364.463	3.49651	5.89843	0.0175104	-0.144767
45	Upper Mantaro	8	100.528	2.07944	4.61044	-1.39956	-1.43276
461	Upper Mantaro	250	3630.4	5.52146	8.1971	2.04246	2.1539
422	Upper Mantaro	100	706.838	4.60517	6.5608	1.12617	0.517608
16	Upper Mantaro	123	1874.9	4.81218	7.53631	1.33319	1.49312
129	Upper Mantaro	45	447.836	3.80666	6.10443	0.327665	0.0612358
87	Upper Mantaro	40	659.922	3.68888	6.49212	0.209882	0.448929
105	Upper Mantaro	25	490.859	3.21888	6.19616	-0.260121	0.152965
201	Upper Mantaro	60	2286.3	4.09434	7.73469	0.615347	1.6915
211	Upper Mantaro	8	209	2.07944	5.34233	-1.39956	-0.700858
567	Upper Mantaro	25	490.859	3.21888	6.19616	-0.260121	0.152965
229	Upper Mantaro	70	2179.54	4.2485	7.68687	0.769498	1.64368
481	Upper Mantaro	150	1656.65	5.01064	7.41255	1.53164	1.36936
292	Upper Mantaro	32	904.752	3.46574	6.80766	-0.0132613	0.764469
431	Upper Mantaro	1600	39334.5	7.37776	10.5799	3.89876	4.53667
429	Upper Mantaro	6	149.524	1.79176	5.00746	-1.68724	-1.03574
312	Upper Mantaro	20	318.077	2.99573	5.76229	-0.483265	-0.280899
320	Upper Mantaro	25	397.596	3.21888	5.98544	-0.260121	-0.0577557
406	Upper Mantaro	50	552.217	3.91202	6.31394	0.433026	0.270748
38	Upper Mantaro	20	251.32	2.99573	5.52673	-0.483265	-0.516465
260	Upper Mantaro	22	276.452	3.09104	5.62204	-0.387955	-0.421155
ZU-LC-10	Basin of Mexico	40	4060	3.68888	8.30894	-1.57666	-3.08729
TE-CL-90	Basin of Mexico	70	149275	4.2485	11.9135	-1.01704	0.51732
TE-CL-3	Basin of Mexico	90	51075	4.49981	10.8411	-0.765729	-0.555175
TE-CL-7	Basin of Mexico	90	85284	4.49981	11.3537	-0.765729	-0.042483
TE-CL-78	Basin of Mexico	90	164250	4.49981	12.0091	-0.765729	0.61292
TE-CL-32	Basin of Mexico	240	350945	5.48064	12.7684	0.2151	1.37216
TE-CL-40	Basin of Mexico	570	1667250	6.34564	14.3267	1.0801	2.93046
TE-CL-31	Basin of Mexico	600	1.53358e+06	6.39693	14.2431	1.13139	2.84689
TE-CL-8	Basin of Mexico	630	513213	6.44572	13.1484	1.18018	1.75222
TE-CL-30	Basin of Mexico	1170	2.14008e+06	7.06476	14.5764	1.79922	3.18013
TE-CL-73	Basin of Mexico	1260	1.96858e+06	7.13887	14.4928	1.87333	3.0966
Teotihuacan	Basin of Mexico	95597	2.81282e+08	11.4679	19.4549	6.20236	8.05864
TX-ET-12	Basin of Mexico	30	4320	3.4012	8.37101	-1.86434	-3.02521
TX-LT-18	Basin of Mexico	40	17000	3.68888	9.74097	-1.57666	-1.65526
TX-LT-31	Basin of Mexico	40	2482.5	3.68888	7.81702	-1.57666	-3.5792
ZU-LT-117	Basin of Mexico	40	9000	3.68888	9.10498	-1.57666	-2.29125
ZU-LT-81	Basin of Mexico	70	65478	4.2485	11.0895	-1.01704	-0.306756
Xochicalco	Basin of Mexico	11984	1.13846e+07	9.39133	16.2478	4.12579	4.85154
CH-AZ-257	Basin of Mexico	20	3960	2.99573	8.284	-2.26981	-3.11223
CH-AZ-280	Basin of Mexico	20	3292	2.99573	8.09925	-2.26981	-3.29697
CH-AZ-63	Basin of Mexico	20	3400	2.99573	8.13153	-2.26981	-3.26469
XO-AZ-14	Basin of Mexico	20	12700	2.99573	9.44936	-2.26981	-1.94687
XO-AZ-59	Basin of Mexico	20	5500	2.99573	8.6125	-2.26981	-2.78372
ZU-AZ-214	Basin of Mexico	20	2026.67	2.99573	7.61415	-2.26981	-3.78208
IX-A-68	Basin of Mexico	30	18750	3.4012	9.83895	-1.86434	-1.55728
ZU-AZ-88	Basin of Mexico	40	9000	3.68888	9.10498	-1.57666	-2.29125
TE-AZ-3	Basin of Mexico	42	9450	3.73767	9.15377	-1.52787	-2.24246
TE-AZ-31	Basin of Mexico	42	21262.5	3.73767	9.9647	-1.52787	-1.43152
TE-AZ-15	Basin of Mexico	49	30625	3.89182	10.3296	-1.37372	-1.06665
XO-AZ-37	Basin of Mexico	50	31583.3	3.91202	10.3604	-1.35352	-1.03584
XO-AZ-49	Basin of Mexico	50	32440	3.91202	10.3871	-1.35352	-1.00908
TE-AZ-5	Basin of Mexico	60	51750	4.09434	10.8542	-1.17119	-0.542045
TX-A-34	Basin of Mexico	60	13153.3	4.09434	9.48443	-1.17119	-1.91179
XO-AZ-47	Basin of Mexico	60	26760	4.09434	10.1947	-1.17119	-1.20156
ZU-AZ-84	Basin of Mexico	60	41000	4.09434	10.6213	-1.17119	-0.774898
TE-AZ-50	Basin of Mexico	70	12127.5	4.2485	9.40323	-1.01704	-1.99299
TX-A-32	Basin of Mexico	80	13851.4	4.38203	9.53614	-0.883512	-1.86008
TE-AZ-16	Basin of Mexico	98	39200	4.58497	10.5764	-0.680571	-0.819793
TE-AZ-45	Basin of Mexico	100	87500	4.60517	11.3794	-0.660369	-0.0168311
TE-AZ-14	Basin of Mexico	105	32156.2	4.65396	10.3784	-0.611578	-1.01786
TE-AZ-32	Basin of Mexico	105	42000	4.65396	10.6454	-0.611578	-0.7508
TE-AZ-78	Basin of Mexico	105	66758.5	4.65396	11.1088	-0.611578	-0.287388
CU-AZ-254	Basin of Mexico	110	84000	4.70048	11.3386	-0.565058	-0.057653
TE-AZ-77	Basin of Mexico	140	110842	4.94164	11.6159	-0.323896	0.219639
TX-A-26	Basin of Mexico	150	27760.7	5.01064	10.2314	-0.254904	-1.16485
TX-A-39	Basin of Mexico	150	18340	5.01064	9.81684	-0.254904	-1.57939
TE-AZ-28	Basin of Mexico	175	194141	5.16479	12.1763	-0.100753	0.780113
TE-AZ-61	Basin of Mexico	175	70000	5.16479	11.1563	-0.100753	-0.239975
TE-AZ-25	Basin of Mexico	210	131250	5.34711	11.7849	0.0815687	0.388634
TE-AZ-58	Basin of Mexico	210	189000	5.34711	12.1495	0.0815687	0.753277
TE-AZ-73	Basin of Mexico	210	94422.8	5.34711	11.4555	0.0815687	0.0593127
TE-AZ-74	Basin of Mexico	210	88632.4	5.34711	11.3923	0.0815687	-0.0039729
TE-AZ-75	Basin of Mexico	210	81850.8	5.34711	11.3127	0.0815687	-0.083572
TE-AZ-82	Basin of Mexico	210	118798	5.34711	11.6852	0.0815687	0.288951
TE-AZ-18	Basin of Mexico	245	304045	5.50126	12.6249	0.235719	1.22871
TE-AZ-27	Basin of Mexico	245	129672	5.50126	11.7728	0.235719	0.376537
TE-AZ-51	Basin of Mexico	245	73735.2	5.50126	11.2082	0.235719	-0.18799
TE-AZ-39	Basin of Mexico	280	112000	5.63479	11.6263	0.369251	0.230029
TE-AZ-40	Basin of Mexico	280	174667	5.63479	12.0706	0.369251	0.67441
TE-AZ-41	Basin of Mexico	280	80713	5.63479	11.2987	0.369251	-0.0975697
TE-AZ-46	Basin of Mexico	280	38888.9	5.63479	10.5685	0.369251	-0.827761
TE-AZ-85	Basin of Mexico	280	105175	5.63479	11.5634	0.369251	0.167156
TX-A-27	Basin of Mexico	300	60800	5.70378	11.0153	0.438244	-0.38088
TE-AZ-43	Basin of Mexico	315	137639	5.75257	11.8324	0.487034	0.436166
TE-AZ-29	Basin of Mexico	350	107188	5.85793	11.5823	0.592394	0.18611
TE-AZ-36	Basin of Mexico	350	218750	5.85793	12.2957	0.592394	0.89946
TE-AZ-57	Basin of Mexico	350	305938	5.85793	12.6311	0.592394	1.23491
TE-AZ-63	Basin of Mexico	350	140000	5.85793	11.8494	0.592394	0.453173
TE-AZ-62	Basin of Mexico	420	168000	6.04025	12.0317	0.774716	0.635494
TE-AZ-71	Basin of Mexico	420	236906	6.04025	12.3754	0.774716	0.979195
TE-AZ-38	Basin of Mexico	490	318500	6.19441	12.6714	0.928867	1.27515
TE-AZ-101	Basin of Mexico	630	543329	6.44572	13.2055	1.18018	1.80924
TE-AZ-103	Basin of Mexico	630	410745	6.44572	12.9257	1.18018	1.5295
TX-A-38	Basin of Mexico	650	83875	6.47697	11.3371	1.21143	-0.0591423
TX-A-31	Basin of Mexico	700	66884.3	6.55108	11.1107	1.28554	-0.285505
TX-A-59	Basin of Mexico	750	93900	6.62007	11.45	1.35453	0.0537605
TX-A-30	Basin of Mexico	1500	179481	7.31322	12.0978	2.04768	0.701598
IX-A-26	Basin of Mexico	1630	1377676	7.39634	14.1359	2.1308	2.73968
TX-A-24	Basin of Mexico	13500	3.28791e+06	9.51044	15.0058	4.24491	3.60954
Tenochtitlan	Basin of Mexico	212500	4.73256e+08	12.2667	19.9751	7.00116	8.57892
5MT3876	Mesa Verde	3	457	1.09861	6.12468	-0.760091	-0.0712847
5MV3812	Mesa Verde	3	432	1.09861	6.06843	-0.760091	-0.127543
5MT9119	Mesa Verde	3	400	1.09861	5.99146	-0.760091	-0.204504
5MT3867	Mesa Verde	3	372	1.09861	5.91889	-0.760091	-0.277074
5MT3870	Mesa Verde	3	238	1.09861	5.47227	-0.760091	-0.723697
5MT840	Mesa Verde	3	168	1.09861	5.12396	-0.760091	-1.072
5MV966	Mesa Verde	3	154	1.09861	5.03695	-0.760091	-1.15902
5MV1006	Mesa Verde	3	135.55	1.09861	4.90934	-0.760091	-1.28663
5MV867	Mesa Verde	3	131.3	1.09861	4.87748	-0.760091	-1.31848
5MT8930	Mesa Verde	3	120	1.09861	4.78749	-0.760091	-1.40848
5MV1595	Mesa Verde	3	115	1.09861	4.74493	-0.760091	-1.45104
5MT830	Mesa Verde	4	353	1.38629	5.86647	-0.472409	-0.3295
5MT6719	Mesa Verde	4	200	1.38629	5.29832	-0.472409	-0.897651
5MV3042	Mesa Verde	4	75	1.38629	4.31749	-0.472409	-1.87848
5MV1927	Mesa Verde	5	925	1.60944	6.82979	-0.249265	0.633826
5MV821	Mesa Verde	5	591	1.60944	6.38182	-0.249265	0.185848
5MT3925	Mesa Verde	5	580	1.60944	6.36303	-0.249265	0.16706
5MT12584	Mesa Verde	5	378	1.60944	5.93489	-0.249265	-0.261074
5MT12651	Mesa Verde	5	184	1.60944	5.21494	-0.249265	-0.981032
5MT16803	Mesa Verde	5	169	1.60944	5.1299	-0.249265	-1.06607
5MT8932	Mesa Verde	5	142	1.60944	4.95583	-0.249265	-1.24014
5MT10430	Mesa Verde	6	560	1.79176	6.32794	-0.0669438	0.131969
5MT4447	Mesa Verde	6	365	1.79176	5.8999	-0.0669438	-0.296071
5MT927	Mesa Verde	7	539	1.94591	6.28972	0.0872068	0.0937474
5MV2901	Mesa Verde	7	128	1.94591	4.85203	0.0872068	-1.34394
5MT1566	Mesa Verde	8	806	2.07944	6.69208	0.220738	0.496116
5MT7984	Mesa Verde	9	788	2.19722	6.6695	0.338521	0.47353
5MT5518	Mesa Verde	14	1064	2.63906	6.96979	0.780354	0.773823
5MT1658	Mesa Verde	3	402	1.09861	5.99645	-0.760091	-0.199516
5MV3126	Mesa Verde	3	330	1.09861	5.79909	-0.760091	-0.396875
5MT178	Mesa Verde	3	236	1.09861	5.46383	-0.760091	-0.732136
5MV4849	Mesa Verde	3	168	1.09861	5.12396	-0.760091	-1.072
5MT5500	Mesa Verde	3	50	1.09861	3.91202	-0.760091	-2.28395
5MV3617	Mesa Verde	4	600	1.38629	6.39693	-0.472409	0.200962
5MT2760	Mesa Verde	4	239	1.38629	5.47646	-0.472409	-0.719505
5MT9400	Mesa Verde	5	267	1.60944	5.58725	-0.249265	-0.608719
5MT6970	Mesa Verde	7	447	1.94591	6.10256	0.0872068	-0.0934095
5MV2471	Mesa Verde	3	550	1.09861	6.30992	-0.760091	0.11395
5MT16781	Mesa Verde	3	525	1.09861	6.2634	-0.760091	0.0674301
5MT2316	Mesa Verde	3	422	1.09861	6.04501	-0.760091	-0.150963
5MT13413	Mesa Verde	3	245	1.09861	5.50126	-0.760091	-0.69471
5MT13955	Mesa Verde	4	397	1.38629	5.98394	-0.472409	-0.212032
5MT1607	Mesa Verde	4	360	1.38629	5.8861	-0.472409	-0.309864
5MT16785	Mesa Verde	5	380	1.60944	5.94017	-0.249265	-0.255797
5MT16783	Mesa Verde	6	654	1.79176	6.48311	-0.0669438	0.287139
5MT832	Mesa Verde	6	560	1.79176	6.32794	-0.0669438	0.131969
5MT1623	Mesa Verde	7	590	1.94591	6.38012	0.0872068	0.184154
5MT4466B	Mesa Verde	3	444	1.09861	6.09582	-0.760091	-0.100144
5MT13435	Mesa Verde	3	200	1.09861	5.29832	-0.760091	-0.897651
5MV747	Mesa Verde	3	197	1.09861	5.2832	-0.760091	-0.912764
5MT1609	Mesa Verde	4	383	1.38629	5.94803	-0.472409	-0.247933
5DL2182	Mesa Verde	4	336	1.38629	5.81711	-0.472409	-0.378857
5MT1640	Mesa Verde	4	300	1.38629	5.70378	-0.472409	-0.492186
5MT8044	Mesa Verde	4	100	1.38629	4.60517	-0.472409	-1.5908
5MV626	Mesa Verde	4	98.6	1.38629	4.59107	-0.472409	-1.6049
5MV820	Mesa Verde	5	656.7	1.60944	6.48723	-0.249265	0.291259
5MT5152	Mesa Verde	5	486	1.60944	6.18621	-0.249265	-0.0097595
5MT4384	Mesa Verde	5	39	1.60944	3.66356	-0.249265	-2.53241
5MT1905	Mesa Verde	7	1233	1.94591	7.11721	0.0872068	0.921237
5MT4803	Mesa Verde	75	10184	4.31749	9.22857	2.45878	3.03261
	Mesa Verde	3	528	1.09861	6.2691	-0.760091	0.0731282
5MT2302	Mesa Verde	3	444	1.09861	6.09582	-0.760091	-0.100144
5MV32	Mesa Verde	3	375	1.09861	5.92693	-0.760091	-0.269042
5MV1168	Mesa Verde	3	351	1.09861	5.86079	-0.760091	-0.335182
5MT3901	Mesa Verde	3	340	1.09861	5.82895	-0.760091	-0.367023
5MT10991H	Mesa Verde	3	275	1.09861	5.61677	-0.760091	-0.579197
5DL2181	Mesa Verde	3	268	1.09861	5.59099	-0.760091	-0.604981
5MT3294	Mesa Verde	3	213	1.09861	5.36129	-0.760091	-0.834676
5MT11962	Mesa Verde	3	180	1.09861	5.19296	-0.760091	-1.00301
5MT7405	Mesa Verde	3	169	1.09861	5.1299	-0.760091	-1.06607
5MT781	Mesa Verde	3	110	1.09861	4.70048	-0.760091	-1.49549
5MT11637	Mesa Verde	3	74	1.09861	4.30407	-0.760091	-1.8919
5MT1805	Mesa Verde	3	73	1.09861	4.29046	-0.760091	-1.90551
5MT16794	Mesa Verde	3	57	1.09861	4.04305	-0.760091	-2.15292
5MT13403	Mesa Verde	4	614	1.38629	6.41999	-0.472409	0.224027
5MT1595	Mesa Verde	4	600	1.38629	6.39693	-0.472409	0.200962
5DL860	Mesa Verde	4	460	1.38629	6.13123	-0.472409	-0.0647416
5MT823	Mesa Verde	4	317	1.38629	5.7589	-0.472409	-0.437066
5MT3958	Mesa Verde	4	140	1.38629	4.94164	-0.472409	-1.25433
5MT3918	Mesa Verde	4	83	1.38629	4.41884	-0.472409	-1.77713
5MV898	Mesa Verde	4	42	1.38629	3.73767	-0.472409	-2.4583
5MT16777	Mesa Verde	5	355	1.60944	5.87212	-0.249265	-0.32385
5MT13314	Mesa Verde	6	911	1.79176	6.81454	-0.0669438	0.618575
5MT16778	Mesa Verde	6	218	1.79176	5.3845	-0.0669438	-0.811473
5MT13314	Mesa Verde	7	888	1.94591	6.78897	0.0872068	0.593004
5DL488	Mesa Verde	7	525	1.94591	6.2634	0.0872068	0.0674301
5MT502	Mesa Verde	7	392	1.94591	5.97126	0.0872068	-0.224706
5DL492	Mesa Verde	8	1276	2.07944	7.15149	0.220738	0.955517
5MT4421A	Mesa Verde	8	1264	2.07944	7.14204	0.220738	0.946068
5MT245	Mesa Verde	8	247	2.07944	5.50939	0.220738	-0.68658
5MT1541	Mesa Verde	9	1500	2.19722	7.31322	0.338521	1.11725
5DL861	Mesa Verde	9	293	2.19722	5.68017	0.338521	-0.515796
5MT4329	Mesa Verde	11	1688	2.3979	7.4313	0.539192	1.23533
5MT7575	Mesa Verde	11	757	2.3979	6.62936	0.539192	0.433395
5MT1648	Mesa Verde	12	2075	2.48491	7.63772	0.626203	1.44175
5MT1655	Mesa Verde	12	1876	2.48491	7.5369	0.626203	1.34093
5DL717	Mesa Verde	12	1050	2.48491	6.95655	0.626203	0.760577
5MT717	Mesa Verde	14	1856	2.63906	7.52618	0.780354	1.33021
5MT10853	Mesa Verde	14	1300	2.63906	7.17012	0.780354	0.974151
	Mesa Verde	14	1100	2.63906	7.00307	0.780354	0.807097
5MT839	Mesa Verde	15	1719	2.70805	7.4495	0.849347	1.25353
5MT532	Mesa Verde	15	1013	2.70805	6.92067	0.849347	0.724703
5MT603	Mesa Verde	16	1266	2.77259	7.14362	0.913885	0.947649
5DL506	Mesa Verde	21	2585	3.04452	7.85748	1.18582	1.66151
5MT121	Mesa Verde	24	3475	3.17805	8.15335	1.31935	1.95738
	Mesa Verde	27	3225	3.29584	8.07869	1.43713	1.88272
5MT875	Mesa Verde	29	2900	3.3673	7.97247	1.50859	1.7765
	Mesa Verde	32	4796	3.46574	8.47554	1.60703	2.27957
5MT7088	Mesa Verde	32	2935	3.46574	7.98446	1.60703	1.78849
5MT1647	Mesa Verde	41	5347	3.71357	8.58429	1.85487	2.38832
5MT835	Mesa Verde	51	4386	3.93183	8.38617	2.07312	2.1902
5MT3793	Mesa Verde	60	5864	4.09434	8.67659	2.23564	2.48062
5DL859	Mesa Verde	95	7384	4.55388	8.90707	2.69517	2.7111
5MT5	Mesa Verde	192	38445.5	5.2575	10.557	3.39879	4.36103
5DL2145	Mesa Verde	3	471	1.09861	6.15486	-0.760091	-0.04111
5MT1512	Mesa Verde	3	438	1.09861	6.08222	-0.760091	-0.113749
5DL531	Mesa Verde	3	176	1.09861	5.17048	-0.760091	-1.02548
5MV535	Mesa Verde	3	173.9	1.09861	5.15848	-0.760091	-1.03749
5MT10459	Mesa Verde	3	88	1.09861	4.47734	-0.760091	-1.71863
5DL911	Mesa Verde	4	543	1.38629	6.29711	-0.472409	0.101141
5MV1320	Mesa Verde	4	109	1.38629	4.69135	-0.472409	-1.50462
5MT4813	Mesa Verde	5	199	1.60944	5.2933	-0.249265	-0.902663
5MT797	Mesa Verde	9	1034	2.19722	6.94119	0.338521	0.745222
5MT11601	Mesa Verde	14	1113	2.63906	7.01481	0.780354	0.818846
5MT1825	Mesa Verde	16	606	2.77259	6.40688	0.913885	0.210912
5MT10438	Mesa Verde	17	2816	2.83321	7.94307	0.97451	1.7471
5MT16789	Mesa Verde	21	898	3.04452	6.80017	1.18582	0.604202
5MT338	Mesa Verde	32	2456	3.46574	7.80629	1.60703	1.61032
5MT5006	Mesa Verde	79	9055	4.36945	9.11107	2.51074	2.9151
5MT765	Mesa Verde	101	9202	4.61512	9.12718	2.75642	2.93121
Ketchen	Middle Missouri	12	1050	2.48491	6.95655	-0.993111	-1.23185
Paul Brave	Middle Missouri	14	1685.6	2.63906	7.42988	-0.838961	-0.758516
McKensey	Middle Missouri	7	689.5	1.94591	6.53597	-1.53211	-1.65243
Bendish	Middle Missouri	45	4914	3.80666	8.49984	0.328645	0.31145
Tony Glas	Middle Missouri	46	7028.8	3.82864	8.85777	0.350623	0.669378
Havens	Middle Missouri	56	6137.6	4.02535	8.72219	0.547334	0.533796
Thomas Riggs	Middle Missouri	22	2912.8	3.09104	7.97687	-0.386975	-0.211523
Cross Ranch	Middle Missouri	9	612.9	2.19722	6.4182	-1.28079	-1.77019
Helb	Middle Missouri	15	1134	2.70805	7.03351	-0.769968	-1.15489
Durkin	Middle Missouri	15	1783.5	2.70805	7.48633	-0.769968	-0.70206
South Cannonball	Middle Missouri	35	3836	3.55535	8.25219	0.0773302	0.0637922
Huff	Middle Missouri	103	12648.4	4.63473	9.44529	1.15671	1.25689
Boley	Middle Missouri	102	8608.8	4.62497	9.06054	1.14695	0.872147
Rock	Middle Missouri	35	2982	3.55535	8.00035	0.0773302	-0.188044
Sakakawea	Middle Missouri	41	6039.3	3.71357	8.70604	0.235554	0.51765
Star Village	Middle Missouri	85	11662	4.44265	9.36409	0.964633	1.1757
Like-a-Fishhook	Middle Missouri	175	34790	5.16479	10.4571	1.68677	2.26869
SVP-CAY-20	Lower Santa	250	3570	5.52146	8.18032	0.614147	0.767424
SVP-CAY-3	Lower Santa	200	1675	5.29832	7.42357	0.391004	0.0106719
SVP-CAY-37	Lower Santa	5	50.75	1.60944	3.92691	-3.29788	-3.48598
SVP-CAY-4	Lower Santa	115	620	4.74493	6.42972	-0.162382	-0.983177
SVP-CAY-7	Lower Santa	150	1466	5.01064	7.29029	0.103321	-0.122604
SVP-CAY-9	Lower Santa	100	5200	4.60517	8.55641	-0.302144	1.14352
SVP-VIN-9	Lower Santa	250	5590	5.52146	8.62873	0.614147	1.21584
SVP-ESUCH-117	Lower Santa	20	115	2.99573	4.74493	-1.91158	-2.66796
SVP-ESUCH-126	Lower Santa	3500	83875	8.16052	11.3371	3.2532	3.92419
SVP-ESUCH-13	Lower Santa	45	2974	3.80666	7.99766	-1.10065	0.584767
SVP-ESUCH-48	Lower Santa	15	25	2.70805	3.21888	-2.19926	-4.19402
SVP-ESUCH-87	Lower Santa	100	504	4.60517	6.22258	-0.302144	-1.19032
SVP-ESUCH-89	Lower Santa	450	6474	6.10925	8.77555	1.20193	1.36265
SVP-ESUCH-9	Lower Santa	125	197	4.82831	5.2832	-0.0790001	-2.12969
SVP-LSUCH-121	Lower Santa	35	504	3.55535	6.22258	-1.35197	-1.19032
SVP-LSUCH-153	Lower Santa	70	241	4.2485	5.4848	-0.658819	-1.9281
SVP-LSUCH-28	Lower Santa	125	515	4.82831	6.24417	-0.0790001	-1.16873
SVP-GUAD-104	Lower Santa	280	3000	5.63479	8.00637	0.727476	0.593471
SVP-GUAD-121	Lower Santa	600	10350	6.39693	9.24474	1.48962	1.83185
SVP-GUAD-27	Lower Santa	10	126	2.30259	4.83628	-2.60473	-2.57661
SVP-ETAN-1	Lower Santa	75	2777.5	4.31749	7.92931	-0.589826	0.51641
SVP-ETAN-100	Lower Santa	110	1250	4.70048	7.1309	-0.206833	-0.281998
SVP-ETAN-147	Lower Santa	5870	142000	8.67761	11.8636	3.7703	4.45069
SVP-ETAN-200	Lower Santa	200	530	5.29832	6.27288	0.391004	-1.14002
SVP-ETAN-22	Lower Santa	260	1875	5.56068	7.53636	0.653368	0.123467
SVP-ETAN-241	Lower Santa	25	264	3.21888	5.57595	-1.68844	-1.83695
SVP-ETAN-242	Lower Santa	50	274	3.91202	5.61313	-0.995291	-1.79977
SVP-ETAN-3	Lower Santa	50	614	3.91202	6.41999	-0.995291	-0.992902
SVP-ETAN-43	Lower Santa	300	7850	5.70378	8.96827	0.796469	1.55537
SVP-ETAN-44	Lower Santa	720	18446	6.57925	9.8226	1.67194	2.40971
SVP-ETAN-56	Lower Santa	270	1845	5.59842	7.52023	0.691108	0.107338
SVP-ETAN-61	Lower Santa	25	880	3.21888	6.77992	-1.68844	-0.632975
SVP-ETAN-7	Lower Santa	140	3969	4.94164	8.28627	0.0343286	0.873373
SVP-LTAN-15	Lower Santa	1500	25900	7.31322	10.162	2.40591	2.7491
SVP-LTAN-23	Lower Santa	70	2400	4.2485	7.78322	-0.658819	0.370327
SVP-LTAN-40	Lower Santa	3550	142000	8.1747	11.8636	3.26739	4.45069
SVP-LTAN-51	Lower Santa	90	758.5	4.49981	6.63134	-0.407504	-0.781554
SVP-ETR-23	Lower Santa	5	63	1.60944	4.14313	-3.29788	-3.26976
SVP-LTR-47	Lower Santa	1650	46421	7.40853	10.7455	2.50122	3.33261
1067	Rio Grande	2	18.8498	0.693147	2.9365	-2.84469	-4.10758
3852	Rio Grande	8	738.817	2.07944	6.60505	-1.47871	-0.468369
21601	Rio Grande	40	840.278	3.68888	6.73373	0.120087	-0.343056
29719	Rio Grande	5	254.541	1.60944	5.53946	-1.95848	-1.53981
135290	Rio Grande	10	740.977	2.30259	6.60797	-1.27963	-0.482545
4619	Rio Grande	70	3359.8	4.2485	8.11964	0.656868	1.02558
6462	Rio Grande	37	2096.89	3.61092	7.64821	0.0241566	0.561745
12587	Rio Grande	21	1514.87	3.04452	7.32309	-0.542059	0.240812
21448	Rio Grande	6	163.29	1.79176	5.09553	-1.7989	-1.98493
21607	Rio Grande	2	21.78	0.693147	3.08099	-2.91114	-4.01451
29744	Rio Grande	5	125.35	1.60944	4.83111	-2.01707	-2.29503
29819	Rio Grande	55	1633.64	4.00733	7.39856	0.36531	0.254765
60372	Rio Grande	16	1191.3	2.77259	7.0828	-0.866602	-0.0590245
672	Rio Grande	128	5330.28	4.85203	8.58116	1.20607	1.43887
9851	Rio Grande	3	31.4928	1.09861	3.44976	-2.53785	-3.6812
12119	Rio Grande	20	808.928	2.99573	6.69571	-0.660874	-0.464461
21453	Rio Grande	8	363.421	2.07944	5.89556	-1.58245	-1.26833
21466	Rio Grande	3	76.104	1.09861	4.3321	-2.57604	-2.84201
21498	Rio Grande	3	37.1712	1.09861	3.61553	-2.59699	-3.58169
21597	Rio Grande	8	184.32	2.07944	5.21667	-1.63744	-2.00991
29677	Rio Grande	3	115.32	1.09861	4.74771	-2.63181	-2.49548
29682	Rio Grande	3	98.3269	1.09861	4.5883	-2.65374	-2.67569
29700	Rio Grande	3	100.052	1.09861	4.60569	-2.67604	-2.68078
29709	Rio Grande	3	37.1712	1.09861	3.61553	-2.69872	-3.69365
29711	Rio Grande	3	150.167	1.09861	5.01175	-2.72178	-2.32901
29764	Rio Grande	15	716.221	2.70805	6.57399	-1.13581	-0.786847
29765	Rio Grande	30	1135.6	3.4012	7.03491	-0.452537	-0.332764
29766	Rio Grande	3	34.68	1.09861	3.54616	-2.75909	-3.82443
29868	Rio Grande	3	27.7248	1.09861	3.32233	-2.78351	-4.08211
359	Rio Grande	200	8791.38	5.29832	9.08153	1.39134	1.64064
12121	Rio Grande	8	473.364	2.07944	6.15986	-1.815	-1.26624
12122	Rio Grande	3	43.32	1.09861	3.76861	-2.81233	-3.66901
29873	Rio Grande	8	447.603	2.07944	6.10391	-1.8573	-1.36737
180	Rio Grande	123	2295.48	4.81218	7.7387	0.858247	0.254753
4605	Rio Grande	30	420.153	3.4012	6.04062	-0.544719	-1.44094
4607	Rio Grande	75	2368.83	4.31749	7.77015	0.366433	0.274997
4616	Rio Grande	65	1449.32	4.17439	7.27885	0.226822	-0.213684
4618	Rio Grande	37	1771.8	3.61092	7.47975	-0.334467	-0.0148411
4621	Rio Grande	15	290.4	2.70805	5.67126	-1.24058	-1.82348
4623	Rio Grande	10	218.276	2.30259	5.38576	-1.65821	-2.12685
4624	Rio Grande	25	630.219	3.21888	6.44607	-0.758336	-1.0876
4688	Rio Grande	4	148.596	1.38629	5.00123	-2.5985	-2.54331
4693	Rio Grande	50	2327.33	3.91202	7.75247	-0.0990201	0.182239
6786	Rio Grande	7	203.818	1.94591	5.31723	-2.06614	-2.25115
12655	Rio Grande	58	2458.41	4.06044	7.80727	0.0270891	0.215688
12668	Rio Grande	2	16.0744	0.693147	2.77723	-3.33992	-4.81211
12675	Rio Grande	18	561.46	2.89037	6.33054	-1.17786	-1.30945
12702	Rio Grande	17	311.413	2.83321	5.74112	-1.24755	-1.9128
15865	Rio Grande	2	35.28	0.693147	3.56332	-3.40103	-4.11117
21291	Rio Grande	18	751.169	2.89037	6.62163	-1.24077	-1.09755
21303	Rio Grande	3	139.057	1.09861	4.93488	-3.04616	-2.79635
21305	Rio Grande	40	1437.6	3.68888	7.27073	-0.489743	-0.491576
21312	Rio Grande	23	1783.55	3.13549	7.48636	-1.04863	-0.28147
21328	Rio Grande	10	470.139	2.30259	6.15303	-1.89346	-1.618
21340	Rio Grande	12	634.235	2.48491	6.45242	-1.7329	-1.33721
21343	Rio Grande	25	912.04	3.21888	6.81568	-1.01908	-0.989492
21366	Rio Grande	30	1184.41	3.4012	7.077	-0.848747	-0.739818
21378	Rio Grande	4	80.4609	1.38629	4.38777	-2.87375	-3.43785
21389	Rio Grande	240	5041.67	5.48064	8.52549	1.18597	0.658448
21402	Rio Grande	13	348.148	2.56495	5.85263	-1.71526	-2.00639
21408	Rio Grande	27	624.675	3.29584	6.43723	-1.00555	-1.44655
21441	Rio Grande	5	214.022	1.60944	5.36608	-2.70452	-2.53579
21450	Rio Grande	40	1335.64	3.68888	7.19717	-0.65931	-0.736797
21469	Rio Grande	16	256	2.77259	5.54518	-1.58405	-2.39823
21621	Rio Grande	8	98	2.07944	4.58497	-2.29777	-3.38959
21625	Rio Grande	31	262.09	3.43399	5.56869	-0.97346	-2.45047
21637	Rio Grande	4	31.7532	1.38629	3.45799	-3.03413	-4.59384
21639	Rio Grande	2	35.0285	0.693147	3.55616	-3.76828	-4.55775
21647	Rio Grande	7	290.09	1.94591	5.67019	-2.56714	-2.50615
21661	Rio Grande	19	404.343	2.94444	6.00226	-1.60426	-2.20889
21665	Rio Grande	22	417.745	3.09104	6.03487	-1.48026	-2.20739
21674	Rio Grande	8	390.881	2.07944	5.9684	-2.513	-2.30539
21677	Rio Grande	12	579.839	2.48491	6.36275	-2.14396	-1.94446
21680	Rio Grande	4	52.9984	1.38629	3.97026	-3.2741	-4.36554
21690	Rio Grande	50	1223.15	3.91202	7.10918	-0.797239	-1.29178
29727	Rio Grande	2	11.3288	0.693147	2.42735	-4.02819	-5.99318
29728	Rio Grande	2	51.2072	0.693147	3.93588	-4.09017	-4.57686
29739	Rio Grande	3	109.808	1.09861	4.69873	-3.74861	-3.88552
29740	Rio Grande	14	797.448	2.63906	6.68142	-2.26767	-1.96451
29746	Rio Grande	26	1385.54	3.2581	7.23385	-1.6852	-1.44376
29777	Rio Grande	9	110.25	2.19722	4.70275	-2.7737	-3.99853
29830	Rio Grande	4	82.3556	1.38629	4.41105	-3.63086	-4.35687
60372	Rio Grande	65	3447.71	4.17439	8.14547	-0.904307	-0.696299
86534	Rio Grande	9	362.188	2.19722	5.89216	-2.89706	-2.96161
3505	Rio Grande	42	1059.61	3.73767	6.96566	-1.40744	-1.94007
1	Rio Grande	175	4142.23	5.16479	8.32899	-0.00545817	-0.611384
909	Rio Grande	188	7071.05	5.23644	8.86376	0.0660986	-0.0877244
3443	Rio Grande	425	8606.25	6.05209	9.06024	0.88297	0.107131
9862	Rio Grande	250	7557.92	5.52146	8.93035	0.369001	-0.0207406
21432	Rio Grande	30	1326.68	3.4012	7.19043	-1.74417	-1.76106
29670	Rio Grande	3	81.9541	1.09861	4.40616	-4.08095	-4.57986
12	Rio Grande	1000	39419.7	6.90776	10.582	1.64657	1.5044
108	Rio Grande	255	14884.2	5.54126	9.60806	0.313685	0.561143
183	Rio Grande	54	2012.09	3.98898	7.60693	-1.23206	-1.4283
301	Rio Grande	500	23290.3	6.21461	10.0558	0.967351	0.990178
3662	Rio Grande	250	25000	5.52146	10.1266	0.295233	1.08254
9867	Rio Grande	20	937.081	2.99573	6.84277	-2.22393	-2.17726
12700	Rio Grande	550	22045.9	6.30992	10.0009	1.03971	0.931367
21443	Rio Grande	12	649.447	2.48491	6.47612	-2.76113	-2.57174
21495	Rio Grande	3	38.5925	1.09861	3.65306	-4.21316	-5.45603
21591	Rio Grande	59	739.762	4.07754	6.60633	-1.337	-2.63583
21667	Rio Grande	9	110.881	2.19722	4.70846	-3.25073	-4.5996
12	Rio Grande	400	16748.8	5.99146	9.72608	0.460155	0.300083
38	Rio Grande	98	3636.15	4.58497	8.19868	-0.934233	-1.21942
12124	Rio Grande	2	43.8048	0.693147	3.77974	-4.8513	-5.67131
38	Rio Grande	185	13685.9	5.22036	9.52412	-0.458853	-0.0844739
183	Rio Grande	680	36450.3	6.52209	10.5037	0.829774	0.892697
9793	Rio Grande	20	787.931	2.99573	6.66941	-2.67218	-2.91534
9865	Rio Grande	68	2369.09	4.21951	7.77026	-1.52938	-1.90283
5	Rio Grande	325	8465.69	5.78383	9.04378	-0.0128565	-0.688782
26	Rio Grande	1542	66031	7.34084	11.0979	1.54374	1.3431
80	Rio Grande	2323	122564	7.75061	11.7164	2.00498	2.00638
239	Rio Grande	2272	120315	7.72842	11.6979	2.05191	2.05705
98	Rio Grande	2636	201661	7.87702	12.2143	2.2738	2.64699
240	Rio Grande	2000	141053	7.6009	11.8569	2.0819	2.38757
40	Rio Grande	2225	127980	7.70751	11.7596	2.26858	2.38214
62	Rio Grande	1140	51550.6	7.03878	10.8503	1.6906	1.56812
70	Rio Grande	230	11032.9	5.43808	9.30864	0.160333	0.0917706
71	Rio Grande	1428	128695	7.26403	11.7652	1.99326	2.55233
274	Rio Grande	1114	65066.3	7.01571	11.0832	1.83554	1.9863
21268	Rio Grande	2	69.0312	0.693147	4.23456	-4.39962	-4.76772
21278	Rio Grande	7	110.187	1.94591	4.70218	-3.36684	-4.53848
60550	Rio Grande	50	3528	3.91202	8.16849	-1.57793	-1.31104
91	Rio Grande	2227	111181	7.70841	11.6189	2.1308	2.06655
38	Rio Grande	39	2933.34	3.66356	7.9839	-1.78871	-1.44691
169	Rio Grande	585	13860.1	6.37161	9.53677	0.807547	0.0155397
252	Rio Grande	892	56518.5	6.79347	10.9423	1.28324	1.42213
306	Rio Grande	2541	244883	7.84031	12.4085	2.42174	2.98992
21273	Rio Grande	2	35.28	0.693147	3.56332	-4.53913	-5.62531
21404	Rio Grande	4	93.7024	1.38629	4.54012	-4.22425	-5.11727
21641	Rio Grande	13	339.662	2.56495	5.82795	-3.42961	-4.29465
170	Rio Grande	600	45514.3	6.39693	10.7258	0.0594047	0.173712
908	Rio Grande	1330	135321	7.19293	11.8154	0.86201	1.28263
82	Rio Grande	400	15537	5.99146	9.65098	-0.231709	-0.721464
297	Rio Grande	1535	129249	7.33629	11.7695	1.08001	1.29399
47	Rio Grande	1000	49000	6.90776	10.7996	0.831483	0.539733
80	Rio Grande	825	43820.7	6.71538	10.6879	0.805407	0.535966
295	Rio Grande	200	42560.7	5.29832	10.6587	-0.410307	0.640784
26	Rio Grande	250	10650.2	5.52146	9.27333	-0.323932	-0.530977
38	Rio Grande	222	15929.5	5.40268	9.67593	-0.604682	-0.393871
92	Rio Grande	744	35019.8	6.61204	10.4637	0	0

## Sheet: Table
Region	N	Beta	S.E.	r2
Basin of Mexico	80	1.19049	0.053805	0.863
Lower Santa	39	1.15305	0.084863	0.833
Mesa Verde	130	1.16652	0.061852	0.735
Middle Missouri	17	1.16284	0.063518	0.957
Upper Mantaro	91	1.13925	0.037331	0.913
All (centered)	357	1.16533	0.026344	0.846
